# Supplementary material for: Individualised Approaches for Catheter Ablation of AF: Patient Selection and Procedural Endpoints
Source: PubMed Central journal article supplement — Arrhythm Electrophysiol Rev. 2019 Jul;8(3):184–90. doi: 10.15420/aer.2019.33.2 (PMC6702473; doi:10.15420/aer.2019.33.2), 2019-07
Supplement: aer-08-184-Sup.pdf [file aer-08-184-Sup.pdf]

# Supplemental material

## Supplemental tables with references

**Supplemental table 1.** Reported risk factors of arrhythmia recurrence after AF ablation; classified by relative level of evidence

|                                                                                              |
|----------------------------------------------------------------------------------------------|
| <b>Established risk factors (meta-analysis and/or extensive consistent literature)</b>       |
| AF type(1–6)                                                                                 |
| Hypertension(4, 5, 7–12)                                                                     |
| Obesity(13–15)                                                                               |
| Metabolic syndrome(11, 16–18)                                                                |
| Chronic kidney disease(16, 17, 19–26)                                                        |
| Obstructive sleep apnea(27–31)                                                               |
| <b>Probable risk factors (Extensive evidence with little conflicting data)</b>               |
| Age(3, 5, 19, 32–35)                                                                         |
| Female gender(3, 6, 33, 34, 36–41)                                                           |
| Duration of AF history(42–46)                                                                |
| Duration of current AF episode/of persistent AF(34, 47–51)                                   |
| Valvular heart disease(50, 52–55)                                                            |
| Cardiomyopathy(16, 17, 56–59)                                                                |
| Structural heart disease*(15, 37)                                                            |
| Chronic hemodialysis(24, 60–62)                                                              |
| Alcohol consumption(33, 63–66)                                                               |
| <b>Possible risk factors (significantly conflicting results or limited body of evidence)</b> |
| Male gender (very late recurrence)(67)                                                       |
| Diabetes mellitus(5, 11, 33, 68, 69)                                                         |
| Coronary artery disease(3, 68, 70)                                                           |

|                                                                 |
|-----------------------------------------------------------------|
| Congestive heart failure(38, 71)                                |
| Dyslipidemia(7, 11, 68)                                         |
| AF burden(72)                                                   |
| Primary persistent AF(73)                                       |
| Chronic pulmonary disease(33)                                   |
| History of hyperthyroidism(74) including amiodarone-induced(75) |
| Anxiety and depression(76, 77)                                  |
| Smoking(42, 78)                                                 |
| Number of failed antiarrhythmic drugs(3, 46)                    |
| Prior stroke(22)                                                |
| Permanent pacemaker for sick sinus syndrome(79)                 |
| Permanent pacemaker for atrioventricular block(80)              |

\*Structural heart disease defined as various combinations of: coronary artery disease, valvular heart disease, dilated cardiomyopathy, hypertrophic cardiomyopathy, hypertensive heart disease and grown-up congenital heart disease.

---

**Supplemental table 2. Clinical prediction scores for arrhythmia recurrence after AF ablation**

| <u>AF recurrence prediction score</u>  | <u>Area under the ROC curve</u>  | <u>References</u> |
|----------------------------------------|----------------------------------|-------------------|
| APPLE                                  | 0.62                             | (19, 81)          |
| ALARMEc                                | 0.66                             | (16, 17)          |
| MB-LATER                               | 0.62-0.78                        | (67, 82)          |
| BASE-AF2                               | 0.94                             | (42)              |
| CAAP-AF                                | 0.65                             | (3)               |
| DR-FLASH                               | Not reported                     | (36)              |
| HATCH                                  | Not predictive for AF recurrence | (83)              |
| CHADS <sub>2</sub>                     | 0.64                             | (68, 84)          |
| CHA <sub>2</sub> DS <sub>2</sub> -VASc | 0.55-0.63                        | (68, 84)          |
| R <sub>2</sub> CHADS <sub>2</sub>      | 0.54-0.55                        | (84)              |

ROC, receiver operating characteristic.

| <b>Supplemental table 3. Imaging predictors of arrhythmia recurrence after AF ablation</b>           |
|------------------------------------------------------------------------------------------------------|
| <b>Structural atrial remodeling</b>                                                                  |
| LA volume (MRI/CT/US)(6, 85–88), area(44) and diameter(4, 5, 9, 39, 46, 89)                          |
| LA sphericity (MRI)(90, 91)                                                                          |
| LA asymmetry index (US)(92) and LA vertical asymmetry (MRI, computational)(93)                       |
| Extent of LA fibrosis (delayed-enhancement MRI)(94–96)                                               |
| Atrial T1 relaxation time (MRI, T1 mapping)(97, 98)                                                  |
| Large LAA volume (TEE(99) and CT(100))                                                               |
| Right atrial diameter (US(51, 101), CT(102)) and surface (US)(103)                                   |
| LAVI to RAVI ratio (CT(104))                                                                         |
| <b>Mechanical atrial remodeling</b>                                                                  |
| Low global LA strain (US(105–111) and MRI(112))                                                      |
| Low LA function index (US)(113)                                                                      |
| Low LA emptying fraction (LA angiography(30), US(52, 114) and CT(115))                               |
| Low LA passive emptying fraction (MRI)(116)                                                          |
| Low LA reservoir function (intracardiac US(117) and LA angiography(30))                              |
| LA stiffness index (diastolic compliance, MRI)(118)                                                  |
| High LA mechanical dispersion (US)(119)                                                              |
| Intra-atrial dyssynchrony (MRI)(120)                                                                 |
| Total atrial conduction time (US)(121–125), inter- and intra-atrial electromechanical delay (US)(35) |
| Decreased LAA mechanical function (TEE)(99, 114, 122, 126–130)                                       |
| <b>LV dysfunction</b>                                                                                |
| LV ejection fraction (US)(12, 16, 131)                                                               |
| LV diastolic dysfunction (diastolic function grade(132), E/e' ratio(133–137), E/A ratio(138))        |
| Ventricular fibrosis(139)                                                                            |
| Left ventricular hypertrophy(140)                                                                    |

|                                                             |
|-------------------------------------------------------------|
| <b>Others</b>                                               |
| Epicardial adipose tissue volume (CT(141–144) and TEE(145)) |
| Larger PV size (MRI(146), CT(147, 148))                     |
| PV anatomy (4 discrete PVs, large ridges; MRI and CT)(149)  |

CT, computed tomography; LA, left atrium; LAA, left atrial appendage; LAVI, left atrial volume index; LV, left ventricle ; RAVI, right atrial volume index; TEE, transesophageal echocardiography; US, ultrasound.

|                                                                                                                    |
|--------------------------------------------------------------------------------------------------------------------|
| <b>Supplemental table 4. Examples of circulating biomarkers predicting arrhythmia recurrence after AF ablation</b> |
| <b>Inflammation and oxidative stress</b>                                                                           |
| CRP and hsCRP(12, 103, 150–154)                                                                                    |
| Erythrocyte sedimentation rate(155)                                                                                |
| Elevated white blood cell count(12, 98)                                                                            |
| IL-6(156, 157)                                                                                                     |
| TNF-alpha(157)                                                                                                     |
| Myeloperoxidase(158)                                                                                               |
| Monocyte to HDL ratio(43)                                                                                          |
| Neutrophil to lymphocyte ratio(159)                                                                                |
| Uric acid(16, 160, 161)                                                                                            |
| Gamma-glutamyl transferase(162)                                                                                    |
| Post-procedural AGEs and TBARs(163)                                                                                |
| <b>Myocardial stretch and injury</b>                                                                               |
| NT-proBNP(127, 164)                                                                                                |
| BNP(150, 165–168)                                                                                                  |

|                                                     |
|-----------------------------------------------------|
| ANP(154)                                            |
| High-sensitive troponin T(86)                       |
| <b>Fibrosis and extracellular matrix remodeling</b> |
| Galectin-3(169)                                     |
| sST2(170)                                           |
| TGF-beta1 (conflicting results)(154, 155, 171–173)  |
| cTGF(174)                                           |
| TIMP-2(154)                                         |
| MicroRNA-21(175)                                    |
| Relaxin(98)                                         |
| sRANKL and sRANKL/OPG ratio(176)                    |
| <b>Comorbidity-associated biomarkers</b>            |
| Homocysteine (early recurrence)(177)                |
| LDL cholesterol(154)                                |
| eGFR(21, 150)                                       |
| Free T3 and free T4(178)                            |
| HbA1c in patients with type 2 diabetes(179)         |
| <b>Others</b>                                       |
| Anti-M2-R antibodies(180)                           |
| Endothelin-1(181)                                   |

**Supplemental table 5. Electrocardiographic predictors of arrhythmia recurrence after AF ablation**

| <b>Markers of atrial cardiomyopathy and underlying heart disease</b>                    |
|-----------------------------------------------------------------------------------------|
| Interatrial block/prolonged P wave duration(72, 182–184) and P wave duration index(185) |
| Decreased P wave morphology variability(186)                                            |
| Prolonged PR interval(187) and first-degree AV block(78)                                |
| Bundle branch block (very late recurrence)(67)                                          |
| Electrocardiographic signs of LV hypertrophy(188)                                       |
| Longer QTc interval(189, 190)                                                           |
| LA voltage/Low-voltage areas(21, 191–193)                                               |
| Longer sinus node recovery time(194, 195)                                               |
| <b>Characteristics of AF activity</b>                                                   |
| AF cycle length(38, 49, 126)                                                            |
| Dominant frequency(48, 196)                                                             |
| F wave amplitude(48, 197, 198)                                                          |
| Organization index(48) and related spectral features(199)                               |
| Recurrence plot indices of AF waveform(200)                                             |
| Distal to proximal CS frequency gradient(201)                                           |
| High RA dominant frequency(202)                                                         |
| Low CS to RA dominant frequency gradient(202)                                           |
| Non-PV triggers(22, 131, 203–206)                                                       |
| Acute PV reconnection at index procedure(192, 207)                                      |
| Number of DC shocks and energy required to terminate AF pre-ablation(208)               |

AV, atrio-ventricular; CS, coronary sinus; DC, direct current; PV, pulmonary vein; RA, right atrium.

## Supplemental references

1. Bhargava M, Di Biase L, Mohanty P, et al. Impact of type of atrial fibrillation and repeat catheter ablation on long-term freedom from atrial fibrillation: results from a multicenter study. *Heart Rhythm* 2009;6:1403–1412.
2. Calkins H, Hindricks G, Cappato R, et al. 2017 HRS/EHRA/ECAS/APHRS/SOLAECE expert consensus statement on catheter and surgical ablation of atrial fibrillation. *Eur. Eur. Pacing Arrhythm. Card. Electrophysiol. J. Work. Groups Card. Pacing Arrhythm. Card. Cell. Electrophysiol. Eur. Soc. Cardiol.* 2018;20:e1–e160.
3. Winkle RA, Jarman JWE, Mead RH, Engel G, Kong MH, Fleming W, Patrawala RA. Predicting atrial fibrillation ablation outcome: The CAAP-AF score. *Heart Rhythm* 2016;13:2119–2125.
4. Arya A, Hindricks G, Sommer P, Huo Y, Bollmann A, Gaspar T, Bode K, Husser D, Kottkamp H, Piorkowski C. Long-term results and the predictors of outcome of catheter ablation of atrial fibrillation using steerable sheath catheter navigation after single procedure in 674 patients. *Eur. Eur. Pacing Arrhythm. Card. Electrophysiol. J. Work. Groups Card. Pacing Arrhythm. Card. Cell. Electrophysiol. Eur. Soc. Cardiol.* 2010;12:173–180.
5. Wokhlu A, Hodge DO, Monahan KH, et al. Long-term outcome of atrial fibrillation ablation: impact and predictors of very late recurrence. *J. Cardiovasc. Electrophysiol.* 2010;21:1071–1078.
6. Mesquita J, Cavaco D, Ferreira AM, Costa FM, Carmo P, Morgado F, Mendes M, Adragão P. Very long-term outcomes after a single catheter ablation procedure for the treatment of atrial fibrillation-the protective role of antiarrhythmic drug therapy. *J. Interv. Card. Electrophysiol. Int. J. Arrhythm. Pacing* 2018;52:39–45.
7. Shah AN, Mittal S, Sichrovsky TC, Cotiga D, Arshad A, Maleki K, Pierce WJ, Steinberg JS. Long-term outcome following successful pulmonary vein isolation: pattern and prediction of very late recurrence. *J. Cardiovasc. Electrophysiol.* 2008;19:661–667.
8. Kamioka M, Hijioka N, Matsumoto Y, Nodera M, Kaneshiro T, Suzuki H, Takeishi Y. Uncontrolled blood pressure affects atrial remodeling and adverse clinical outcome in paroxysmal atrial fibrillation. *Pacing Clin. Electrophysiol. PACE* 2018;41:402–410.
9. Berruezo A, Tamborero D, Mont L, Benito B, Tolosana JM, Sitges M, Vidal B, Arriagada G, Méndez F, Matiello M, Molina I, Brugada J. Pre-procedural predictors of atrial fibrillation recurrence after circumferential pulmonary vein ablation. *Eur. Heart J.* 2007;28:836–841.
10. Santoro F, Di Biase L, Trivedi C, et al. Impact of Uncontrolled Hypertension on Atrial Fibrillation Ablation Outcome. *JACC Clin. Electrophysiol.* 2015;1:164–173.
11. Lin KJ, Cho SI, Tiwari N, Bergman M, Kizer JR, Palma EC, Taub CC. Impact of metabolic syndrome on the risk of atrial fibrillation recurrence after catheter ablation: systematic review and meta-analysis. *J. Interv. Card. Electrophysiol. Int. J. Arrhythm. Pacing* 2014;39:211–223.
12. Letsas KP, Weber R, Bürkle G, Mihos CC, Minners J, Kalusche D, Arentz T. Pre-ablative predictors of atrial fibrillation recurrence following pulmonary vein isolation: the potential role of inflammation. *Eur. Eur. Pacing Arrhythm. Card. Electrophysiol. J. Work. Groups Card. Pacing Arrhythm. Card. Cell. Electrophysiol. Eur. Soc. Cardiol.* 2009;11:158–163.



13. Mainigi SK, Sauer WH, Cooper JM, Dixit S, Gerstenfeld EP, Callans DJ, Russo AM, Verdino RJ, Lin D, Zado ES, Marchlinski FE. Incidence and Predictors of Very Late Recurrence of Atrial Fibrillation After Ablation. *J. Cardiovasc. Electrophysiol.* 2007;18:69–74.
14. Wong CX, Sullivan T, Sun MT, Mahajan R, Pathak RK, Middeldorp M, Twomey D, Ganesan AN, Rangnekar G, Roberts-Thomson KC, Lau DH, Sanders P. Obesity and the Risk of Incident, Post-Operative, and Post-Ablation Atrial Fibrillation: A Meta-Analysis of 626,603 Individuals in 51 Studies. *JACC Clin. Electrophysiol.* 2015;1:139–152.
15. Saguner AM, Maurer T, Wissner E, et al. Catheter ablation of atrial fibrillation in very young adults: a 5-year follow-up study. *Eur. Eur. Pacing Arrhythm. Card. Electrophysiol. J. Work. Groups Card. Pacing Arrhythm. Card. Cell. Electrophysiol. Eur. Soc. Cardiol.* 2018;20:58–64.
16. Berkowitsch A, Kuniss M, Greiss H, Wójcik M, Zaltsberg S, Lehinant S, Erkapic D, Pajitnev D, Pitschner H-F, Hamm CW, Neumann T. Impact of impaired renal function and metabolic syndrome on the recurrence of atrial fibrillation after catheter ablation: a long term follow-up. *Pacing Clin. Electrophysiol. PACE* 2012;35:532–543.
17. Wójcik M, Berkowitsch A, Greiss H, Zaltsberg S, Pajitnev D, Deubner N, Hamm CW, Pitschner HF, Kuniss M, Neumann T. Repeated catheter ablation of atrial fibrillation: how to predict outcome? *Circ. J. Off. J. Jpn. Circ. Soc.* 2013;77:2271–2279.
18. Dinov B, Kosiuk J, Kircher S, Bollmann A, Acou W-J, Arya A, Hindricks G, Rolf S. Impact of metabolic syndrome on left atrial electroanatomical remodeling and outcomes after radiofrequency ablation of nonvalvular atrial fibrillation. *Circ. Arrhythm. Electrophysiol.* 2014;7:483–489.
19. Kornej J, Hindricks G, Shoemaker MB, et al. The APPLE score: a novel and simple score for the prediction of rhythm outcomes after catheter ablation of atrial fibrillation. *Clin. Res. Cardiol. Off. J. Ger. Card. Soc.* 2015;104:871–876.
20. Berkowitsch A, Wójcik M, Zaltsberg S, Pajitnev D, Erkapic D, Schmitt J, Hamm C, Kuniss M, Neumann T. Atrial Fibrillation and Renal Disease. *J. Atr. Fibrillation* 2013;6:837.
21. Chao T-F, Lin Y-J, Chang S-L, Lo L-W, Hu Y-F, Tuan T-C, Suenari K, Li C-H, Chen S-A. Associations between renal function, atrial substrate properties and outcome of catheter ablation in patients with paroxysmal atrial fibrillation. *Circ. J. Off. J. Jpn. Circ. Soc.* 2011;75:2326–2332.
22. Yanagisawa S, Inden Y, Kato H, Fujii A, Mizutani Y, Ito T, Kamikubo Y, Kanzaki Y, Ando M, Hirai M, Shibata R, Murohara T. Impaired renal function is associated with recurrence after cryoballoon catheter ablation for paroxysmal atrial fibrillation: A potential effect of non-pulmonary vein foci. *J. Cardiol.* 2017;69:3–10.
23. Wójcik M, Erkapic D, Berkowitsch A, et al. Ipsilateral circumferential radiofrequency ablation of atrial fibrillation with irrigated tip catheter: long-term outcome and pre-procedural predictors. *Circ. J. Off. J. Jpn. Circ. Soc.* 2013;77:2280–2287.
24. Boriani G, Savelieva I, Dan G-A, et al. Chronic kidney disease in patients with cardiac rhythm disturbances or implantable electrical devices: clinical significance and implications for decision making—a position paper of the European Heart Rhythm Association endorsed by the Heart Rhythm Society and the Asia Pacific Heart Rhythm Society. *Eur. Eur. Pacing Arrhythm. Card. Electrophysiol. J. Work. Groups Card. Pacing Arrhythm. Card. Cell. Electrophysiol. Eur. Soc. Cardiol.* 2015;17:1169–1196.

25. Li M, Liu T, Luo D, Li G. Systematic review and meta-analysis of chronic kidney disease as predictor of atrial fibrillation recurrence following catheter ablation. *Cardiol. J.* 2014;21:89–95.
26. Neumann T, Wójcik M, Berkowitsch A, Erkapic D, Zaltsberg S, Greiss H, Pajitnev D, Lehinant S, Schmitt J, Hamm CW, Pitschner HF, Kuniss M. Cryoballoon ablation of paroxysmal atrial fibrillation: 5-year outcome after single procedure and predictors of success. *Eur. Eur. Pacing Arrhythm. Card. Electrophysiol. J. Work. Groups Card. Pacing Arrhythm. Card. Cell. Electrophysiol. Eur. Soc. Cardiol.* 2013;15:1143–1149.
27. Li L, Wang Z, Li J, Ge X, Guo L, Wang Y, Guo W, Jiang C, Ma C. Efficacy of catheter ablation of atrial fibrillation in patients with obstructive sleep apnoea with and without continuous positive airway pressure treatment: a meta-analysis of observational studies. *Eur. Eur. Pacing Arrhythm. Card. Electrophysiol. J. Work. Groups Card. Pacing Arrhythm. Card. Cell. Electrophysiol. Eur. Soc. Cardiol.* 2014;16:1309–1314.
28. Kawakami H, Nagai T, Fujii A, Uetani T, Nishimura K, Inoue K, Suzuki J, Oka Y, Okura T, Higaki J, Ogimoto A, Ikeda S. Apnea-hypopnea index as a predictor of atrial fibrillation recurrence following initial pulmonary vein isolation: usefulness of type-3 portable monitor for sleep-disordered breathing. *J. Interv. Card. Electrophysiol. Int. J. Arrhythm. Pacing* 2016;47:237–244.
29. Shukla A, Aizer A, Holmes D, Fowler S, Park DS, Bernstein S, Bernstein N, Chinitz L. Effect of Obstructive Sleep Apnea Treatment on Atrial Fibrillation Recurrence: A Meta-Analysis. *JACC Clin. Electrophysiol.* 2015;1:41–51.
30. Park H-C, Lee Y, Lee D, Park YM, Shim J, Ban J-E, Choi J-I, Park S-W, Kim Y-H. Left atrial functional reservoir: predictive value for outcome of catheter ablation in paroxysmal atrial fibrillation. *Int. J. Cardiovasc. Imaging* 2014;30:1423–1434.
31. Fein AS, Shvilkin A, Shah D, Haffajee CI, Das S, Kumar K, Kramer DB, Zimetbaum PJ, Buxton AE, Josephson ME, Anter E. Treatment of obstructive sleep apnea reduces the risk of atrial fibrillation recurrence after catheter ablation. *J. Am. Coll. Cardiol.* 2013;62:300–305.
32. Bhargava M, Marrouche NF, Martin DO, et al. Impact of age on the outcome of pulmonary vein isolation for atrial fibrillation using circular mapping technique and cooled-tip ablation catheter. *J. Cardiovasc. Electrophysiol.* 2004;15:8–13.
33. Arora S, Lahewala S, Tripathi B, et al. Causes and Predictors of Readmission in Patients With Atrial Fibrillation Undergoing Catheter Ablation: A National Population-Based Cohort Study. *J. Am. Heart Assoc.* 2018;7.
34. Zhang X-D, Gu J, Jiang W-F, Zhao L, Wang Y-L, Liu Y-G, Zhou L, Gu J-N, Wu S-H, Xu K, Liu X. The impact of age on the efficacy and safety of catheter ablation for long-standing persistent atrial fibrillation. *Int. J. Cardiol.* 2013;168:2693–2698.
35. Evranos B, Aytemir K, Oto A, Okutucu S, Karakulak U, Şahiner L, Kaya B, Kabakçı G. Predictors of atrial fibrillation recurrence after atrial fibrillation ablation with cryoballoon. *Cardiol. J.* 2013;20:294–303.
36. Kosiuk J, Dinov B, Kornej J, et al. Prospective, multicenter validation of a clinical risk score for left atrial arrhythmogenic substrate based on voltage analysis: DR-FLASH score. *Heart Rhythm* 2015;12:2207–2212.

37. Schreiber D, Rostock T, Fröhlich M, et al. Five-year follow-up after catheter ablation of persistent atrial fibrillation using the stepwise approach and prognostic factors for success. *Circ. Arrhythm. Electrophysiol.* 2015;8:308–317.
38. Rostock T, Salukhe TV, Steven D, et al. Long-term single- and multiple-procedure outcome and predictors of success after catheter ablation for persistent atrial fibrillation. *Heart Rhythm* 2011;8:1391–1397.
39. Lee H-L, Hwang Y-T, Chang P-C, Wen M-S, Chou C-C. A three-year longitudinal study of the relation between left atrial diameter remodeling and atrial fibrillation ablation outcome. *J. Geriatr. Cardiol. JGC* 2018;15:486–491.
40. Roh S-Y, Shim J, Lee K-N, Ahn J, Kim D-H, Lee DI, Choi J-I, Kim Y-H. Gender-related Difference in Clinical Outcome of the Patient with Atrial Fibrillation after Radiofrequency Catheter Ablation. *Korean Circ. J.* 2018;48:605–618.
41. Zhang X-D, Tan H-W, Gu J, Jiang W-F, Zhao L, Wang Y-L, Liu Y-G, Zhou L, Gu J-N, Liu X. Efficacy and safety of catheter ablation for long-standing persistent atrial fibrillation in women. *Pacing Clin. Electrophysiol. PACE* 2013;36:1236–1244.
42. Canpolat U, Aytemir K, Yorgun H, Şahiner L, Kaya EB, Oto A. A proposal for a new scoring system in the prediction of catheter ablation outcomes: promising results from the Turkish Cryoablation Registry. *Int. J. Cardiol.* 2013;169:201–206.
43. Canpolat U, Aytemir K, Yorgun H, Şahiner L, Kaya EB, Çay S, Topaloğlu S, Aras D, Oto A. The role of preprocedural monocyte-to-high-density lipoprotein ratio in prediction of atrial fibrillation recurrence after cryoballoon-based catheter ablation. *Eur. Eur. Pacing Arrhythm. Card. Electrophysiol. J. Work. Groups Card. Pacing Arrhythm. Card. Cell. Electrophysiol. Eur. Soc. Cardiol.* 2015;17:1807–1815.
44. Akkaya E, Berkowitsch A, Zaltsberg S, Greiss H, Hamm CW, Sperzel J, Neumann T, Kuniss M. Second-generation cryoballoon ablation for treatment of persistent atrial fibrillation: Three-year outcome and predictors of recurrence after a single procedure. *J. Cardiovasc. Electrophysiol.* 2018;29:38–45.
45. Boveda S, Providência R, Defaye P, et al. Outcomes after cryoballoon or radiofrequency ablation for persistent atrial fibrillation: a multicentric propensity-score matched study. *J. Interv. Card. Electrophysiol. Int. J. Arrhythm. Pacing* 2016;47:133–142.
46. Takigawa M, Takahashi A, Kuwahara T, et al. Long-term follow-up after catheter ablation of paroxysmal atrial fibrillation: the incidence of recurrence and progression of atrial fibrillation. *Circ. Arrhythm. Electrophysiol.* 2014;7:267–273.
47. Ciconte G, Ottaviano L, de Asmundis C, et al. Pulmonary vein isolation as index procedure for persistent atrial fibrillation: One-year clinical outcome after ablation using the second-generation cryoballoon. *Heart Rhythm* 2015;12:60–66.
48. Lankveld T, Zeemering S, Scherr D, Kuklik P, Hoffmann BA, Willems S, Pieske B, Haïssaguerre M, Jaïs P, Crijns HJ, Schotten U. Atrial Fibrillation Complexity Parameters Derived From Surface ECGs Predict Procedural Outcome and Long-Term Follow-Up of Stepwise Catheter Ablation for Atrial Fibrillation. *Circ. Arrhythm. Electrophysiol.* 2016;9:e003354.

49. Matsuo S, Lellouche N, Wright M, et al. Clinical Predictors of Termination and Clinical Outcome of Catheter Ablation for Persistent Atrial Fibrillation. *J. Am. Coll. Cardiol.* 2009;54:788–795.
50. Zhao L, Jiang W, Zhou L, Gu J, Wang Y, Liu Y, Zhang X, Wu S, Liu X. The role of valvular regurgitation in catheter ablation outcomes of patients with long-standing persistent atrial fibrillation. *Eur. Eur. Pacing Arrhythm. Card. Electrophysiol. J. Work. Groups Card. Pacing Arrhythm. Card. Cell. Electrophysiol. Eur. Soc. Cardiol.* 2014;16:848–854.
51. Zhao L, Jiang W, Zhou L, Gu J, Wang Y, Liu Y, Zhang X, Wu S, Liu X. Why atrial fibrillation recurs in patients who obtained current ablation endpoints with longstanding persistent atrial fibrillation. *J. Interv. Card. Electrophysiol. Int. J. Arrhythm. Pacing* 2013;37:283–290.
52. Chou C-C, Lee H-L, Chang P-C, Wo H-T, Wen M-S, Yeh S-J, Lin F-C, Hwang Y-T. Left atrial emptying fraction predicts recurrence of atrial fibrillation after radiofrequency catheter ablation. *PLoS One* 2018;13:e0191196.
53. Fredersdorf S, Fenzl C, Jungbauer C, Weber S, von Bary C, Dietl A, Seegers J, Maier LS, Ücer E. Long-term outcomes and predictors of recurrence after pulmonary vein isolation with multielectrode ablation catheter in patients with atrial fibrillation. *J. Cardiovasc. Med. Hagerstown Md* 2018;19:148–154.
54. Qiao Y, Wu L, Hou B, Sun W, Zheng L, Ding L, Chen G, Zhang S, Yao Y. Functional mitral regurgitation: predictor for atrial substrate remodeling and poor ablation outcome in paroxysmal atrial fibrillation. *Medicine (Baltimore)* 2016;95:e4333.
55. Takigawa M, Kuwahara T, Takahashi A, et al. The mechanism of mitral regurgitation assessed by preprocedural echocardiography is associated with the outcome of catheter ablation in patients with paroxysmal atrial fibrillation. *J. Interv. Card. Electrophysiol. Int. J. Arrhythm. Pacing* 2016;46:299–306.
56. Moran D, De Regibus V, de Asmundis C, et al. Second generation cryoballoon ablation for atrial fibrillation in young adults: midterm outcome in patients under 40 years of age. *Eur. Eur. Pacing Arrhythm. Card. Electrophysiol. J. Work. Groups Card. Pacing Arrhythm. Card. Cell. Electrophysiol. Eur. Soc. Cardiol.* 2018;20:295–300.
57. Roh S-Y, Kim D-H, Ahn J, Lee KN, Lee DI, Shim J, Choi J-I, Park S-W, Kim Y-H. Long-Term Outcome of Catheter Ablation for Atrial Fibrillation in Patients With Apical Hypertrophic Cardiomyopathy. *J. Cardiovasc. Electrophysiol.* 2016;27:788–795.
58. Contreras-Valdes FM, Buxton AE, Josephson ME, Anter E. Atrial fibrillation ablation in patients with hypertrophic cardiomyopathy: long-term outcomes and clinical predictors. *J. Am. Coll. Cardiol.* 2015;65:1485–1487.
59. Zhao L, Xu K, Jiang W, Zhou L, Wang Y, Zhang X, Wu S, Liu X. Long-term outcomes of catheter ablation of atrial fibrillation in dilated cardiomyopathy. *Int. J. Cardiol.* 2015;190:227–232.
60. Hayashi M, Kaneko S, Shimano M, Ohashi T, Kubota R, Takeshita K, Shinoda M, Inden Y, Kanayama H, Murohara T. Efficacy and safety of radiofrequency catheter ablation for atrial fibrillation in chronic hemodialysis patients. *Nephrol. Dial. Transplant. Off. Publ. Eur. Dial. Transpl. Assoc. - Eur. Ren. Assoc.* 2014;29:160–167.

61. Takigawa M, Kuwahara T, Takahashi A, et al. The impact of haemodialysis on the outcomes of catheter ablation in patients with paroxysmal atrial fibrillation. *Eur. Eur. Pacing Arrhythm. Card. Electrophysiol. J. Work. Groups Card. Pacing Arrhythm. Card. Cell. Electrophysiol. Eur. Soc. Cardiol.* 2014;16:327–334.
62. Sairaku A, Yoshida Y, Kamiya H, Tatematsu Y, Nanasato M, Hirayama H, Nakano Y, Kihara Y. Outcomes of ablation of paroxysmal atrial fibrillation in patients on chronic hemodialysis. *J. Cardiovasc. Electrophysiol.* 2012;23:1289–1294.
63. Patel N, Chung E, Mounsey J, Schwartz J, Pursell I, Gehi A. Does Alcohol Use Increase the Risk of Atrial Fibrillation Recurrence After Radiofrequency Ablation? *J. Am. Coll. Cardiol.* 2018;61:E323.
64. Hu Y-F, Chang Y-T, Lin Y-J, et al. The roles of alcohol dehydrogenase in patients with atrial fibrillation. *Pacing Clin. Electrophysiol. PACE* 2017;40:1446–1453.
65. Qiao Y, Shi R, Hou B, Wu L, Zheng L, Ding L, Chen G, Zhang S, Yao Y. Impact of Alcohol Consumption on Substrate Remodeling and Ablation Outcome of Paroxysmal Atrial Fibrillation. *J. Am. Heart Assoc.* 2015;4.
66. Pathak RK, Middeldorp ME, Lau DH, et al. Aggressive risk factor reduction study for atrial fibrillation and implications for the outcome of ablation: the ARREST-AF cohort study. *J. Am. Coll. Cardiol.* 2014;64:2222–2231.
67. Mujović N, Marinković M, Marković N, Shantsila A, Lip GYH, Potpara TS. Prediction of very late arrhythmia recurrence after radiofrequency catheter ablation of atrial fibrillation: The MB-LATER clinical score. *Sci. Rep.* 2017;7:40828.
68. Letsas KP, Efremidis M, Giannopoulos G, Deftereos S, Lioni L, Korantzopoulos P, Vlachos K, Xydonas S, Kossyvakis C, Sideris A. CHADS2 and CHA2DS2-VASc scores as predictors of left atrial ablation outcomes for paroxysmal atrial fibrillation. *Eur. Eur. Pacing Arrhythm. Card. Electrophysiol. J. Work. Groups Card. Pacing Arrhythm. Card. Cell. Electrophysiol. Eur. Soc. Cardiol.* 2014;16:202–207.
69. Anselmino M, Matta M, D'ascenzo F, et al. Catheter ablation of atrial fibrillation in patients with diabetes mellitus: a systematic review and meta-analysis. *Eur. Eur. Pacing Arrhythm. Card. Electrophysiol. J. Work. Groups Card. Pacing Arrhythm. Card. Cell. Electrophysiol. Eur. Soc. Cardiol.* 2015;17:1518–1525.
70. Kornej J, Hindricks G, Arya A, Sommer P, Husser D, Rolf S, Bollmann A. Presence and extent of coronary artery disease as predictor for AF recurrences after catheter ablation: The Leipzig Heart Center AF Ablation Registry. *Int. J. Cardiol.* 2015;181:188–192.
71. Calvo N, Bisbal F, Guiu E, Ramos P, Nadal M, Tolosana JM, Arbelo E, Berruezo A, Sitges M, Brugada J, Mont L. Impact of atrial fibrillation-induced tachycardiomyopathy in patients undergoing pulmonary vein isolation. *Int. J. Cardiol.* 2013;168:4093–4097.
72. Knecht S, Pradella M, Reichlin T, Mühl A, Bossard M, Stieltjes B, Conen D, Bremerich J, Osswald S, Kühne M, Sticherling C. Left atrial anatomy, atrial fibrillation burden, and P-wave duration-relationships and predictors for single-procedure success after pulmonary vein isolation. *Eur. Eur. Pacing Arrhythm. Card. Electrophysiol. J. Work. Groups Card. Pacing Arrhythm. Card. Cell. Electrophysiol. Eur. Soc. Cardiol.* 2018;20:271–278.

73. Konrad T, Theis C, Mollnau H, Sonnenschein S, Ocete BQ, Bock K, Münzel T, Rostock T. Primary Persistent Atrial Fibrillation: A Distinct Arrhythmia Subentity of an Ablation Population. *J. Cardiovasc. Electrophysiol.* 2015;26:1289–1294.
74. Wongcharoen W, Lin Y-J, Chang S-L, et al. History of hyperthyroidism and long-term outcome of catheter ablation of drug-refractory atrial fibrillation. *Heart Rhythm* 2015;12:1956–1962.
75. Mikhaylov EN, Orshanskaya VS, Lebedev AD, Szili-Torok T, Lebedev DS. Catheter ablation of paroxysmal atrial fibrillation in patients with previous amiodarone-induced hyperthyroidism: a case-control study. *J. Cardiovasc. Electrophysiol.* 2013;24:888–893.
76. Efremidis M, Letsas KP, Lioni L, Giannopoulos G, Korantzopoulos P, Vlachos K, Dimopoulos NP, Karlis D, Bouras G, Sideris A, Deftereos S. Association of quality of life, anxiety, and depression with left atrial ablation outcomes. *Pacing Clin. Electrophysiol. PACE* 2014;37:703–711.
77. Yu S, Zhao Q, Wu P, Qin M, Huang H, Cui H, Huang C. Effect of anxiety and depression on the recurrence of paroxysmal atrial fibrillation after circumferential pulmonary vein ablation. *J. Cardiovasc. Electrophysiol.* 2012;23 Suppl 1:S17-23.
78. Buiatti A, Kaess B, Reents T, Semmler V, Telishveska M, Bourier F, Kornmayer M, Kottmaier M, Hessling G, Deisenhofer I. Catheter Ablation for “Lone” Atrial Fibrillation: Efficacy and Predictors of Recurrence. *J. Cardiovasc. Electrophysiol.* 2016;27:536–541.
79. Wu J-T, Dong J-Z, Sang C-H, Tang R-B, Li X-H, Ma C-S. Efficacy of catheter ablation for atrial fibrillation in patients with a permanent pacemaker for sick sinus syndrome. *Intern. Med. Tokyo Jpn.* 2013;52:2305–2310.
80. Wu J-T, Dong J-Z, Wang S-L, Chu Y-J, Wang L-X, Yang C-K. Efficacy of catheter ablation for atrial fibrillation in patients with a permanent pacemaker for atrioventricular block. *Int. Heart. J.* 2014;55:489–493.
81. Kornej J, Hindricks G, Arya A, Sommer P, Husser D, Bollmann A. The APPLE Score - A Novel Score for the Prediction of Rhythm Outcomes after Repeat Catheter Ablation of Atrial Fibrillation. *PloS One* 2017;12:e0169933.
82. Potpara TS, Mujovic N, Sivasambu B, Shantsila A, Marinkovic M, Calkins H, Spragg D, Lip GYH. Validation of the MB-LATER score for prediction of late recurrence after catheter-ablation of atrial fibrillation. *Int. J. Cardiol.* 2018.
83. Tang R-B, Dong J-Z, Long D-Y, Yu R-H, Ning M, Jiang C-X, Sang C-H, Liu X-H, Ma C-S. Efficacy of catheter ablation of atrial fibrillation beyond HATCH score. *Chin. Med. J. (Engl.)* 2012;125:3425–3429.
84. Kornej J, Hindricks G, Kosiuk J, Arya A, Sommer P, Husser D, Rolf S, Richter S, Huo Y, Piorkowski C, Bollmann A. Comparison of CHADS2, R2CHADS2, and CHA2DS2-VASc scores for the prediction of rhythm outcomes after catheter ablation of atrial fibrillation: the Leipzig Heart Center AF Ablation Registry. *Circ. Arrhythm. Electrophysiol.* 2014;7:281–287.
85. Njoku A, Kannabhiran M, Arora R, Reddy P, Gopinathannair R, Lakkireddy D, Dominic P. Left atrial volume predicts atrial fibrillation recurrence after radiofrequency ablation: a meta-analysis. *Eur. Eur. Pacing Arrhythm. Card. Electrophysiol. J. Work. Groups Card. Pacing Arrhythm. Card. Cell. Electrophysiol. Eur. Soc. Cardiol.* 2018;20:33–42.

86. Nakanishi K, Fukuda S, Yamashita H, Hasegawa T, Kosaka M, Shirai N, Shimada K, Yoshikawa J, Tanaka A. High-sensitive cardiac troponin T as a novel predictor for recurrence of atrial fibrillation after radiofrequency catheter ablation. *Eur. Eur. Pacing Arrhythm. Card. Electrophysiol. J. Work. Groups Card. Pacing Arrhythm. Card. Cell. Electrophysiol. Eur. Soc. Cardiol.* 2017;19:1951–1957.
87. Pontone G, Andreini D, Bertella E, et al. Comparison of cardiac computed tomography versus cardiac magnetic resonance for characterization of left atrium anatomy before radiofrequency catheter ablation of atrial fibrillation. *Int. J. Cardiol.* 2015;179:114–121.
88. Sohns C, Sohns JM, Vollmann D, Lüthje L, Bergau L, Dorenkamp M, Zwaka PA, Hasenfuß G, Lotz J, Zabel M. Left atrial volumetry from routine diagnostic work up prior to pulmonary vein ablation is a good predictor of freedom from atrial fibrillation. *Eur. Heart J. Cardiovasc. Imaging* 2013;14:684–691.
89. Zhuang J, Wang Y, Tang K, Li X, Peng W, Liang C, Xu Y. Association between left atrial size and atrial fibrillation recurrence after single circumferential pulmonary vein isolation: a systematic review and meta-analysis of observational studies. *EP Eur.* 2012;14:638–645.
90. Bisbal F, Guiu E, Calvo N, et al. Left atrial sphericity: a new method to assess atrial remodeling. Impact on the outcome of atrial fibrillation ablation. *J. Cardiovasc. Electrophysiol.* 2013;24:752–759.
91. den Uijl DW, Cabanelas N, Benito EM, et al. Impact of left atrial volume, sphericity, and fibrosis on the outcome of catheter ablation for atrial fibrillation. *J. Cardiovasc. Electrophysiol.* 2018;29:740–746.
92. Nedios S, Koutalas E, Sommer P, Arya A, Rolf S, Husser D, Bollmann A, Hindricks G, Breithardt O-A. Asymmetrical left atrial remodelling in atrial fibrillation: relation with diastolic dysfunction and long-term ablation outcomes. *Eur. Eur. Pacing Arrhythm. Card. Electrophysiol. J. Work. Groups Card. Pacing Arrhythm. Card. Cell. Electrophysiol. Eur. Soc. Cardiol.* 2017;19:1463–1469.
93. Varela M, Bisbal F, Zacur E, Berruezo A, Aslanidi OV, Mont L, Lamata P. Novel Computational Analysis of Left Atrial Anatomy Improves Prediction of Atrial Fibrillation Recurrence after Ablation. *Front. Physiol.* 2017;8:68.
94. Marrouche NF, Wilber D, Hindricks G, et al. Association of atrial tissue fibrosis identified by delayed enhancement MRI and atrial fibrillation catheter ablation: the DECAAF study. *JAMA* 2014;311:498–506.
95. Chelu MG, King JB, Kholmovski EG, et al. Atrial Fibrosis by Late Gadolinium Enhancement Magnetic Resonance Imaging and Catheter Ablation of Atrial Fibrillation: 5-Year Follow-Up Data. *J. Am. Heart Assoc.* 2018;7:e006313.
96. Khurram IM, Habibi M, Gucuk Ipek E, et al. Left Atrial LGE and Arrhythmia Recurrence Following Pulmonary Vein Isolation for Paroxysmal and Persistent AF. *JACC Cardiovasc. Imaging* 2016;9:142–148.
97. Ling L, McLellan AJA, Taylor AJ, et al. Magnetic resonance post-contrast T1 mapping in the human atrium: Validation and impact on clinical outcome after catheter ablation for atrial fibrillation. *Heart Rhythm* 2014;11:1551–1559.

98. Luetkens JA, Wolpers AC, Beiert T, et al. Cardiac magnetic resonance using late gadolinium enhancement and atrial T1 mapping predicts poor outcome in patients with atrial fibrillation after catheter ablation therapy. *Sci. Rep.* 2018;8:13618.
99. He Y, Zhang B, Zhu F, Hu Z, Zhong J, Zhu W. Transesophageal echocardiography measures left atrial appendage volume and function and predicts recurrence of paroxysmal atrial fibrillation after radiofrequency catheter ablation. *Echocardiogr. Mt. Kisco N* 2018;35:985–990.
100. Pinto Teixeira P, Martins Oliveira M, Ramos R, Rio P, Silva Cunha P, Delgado AS, Pimenta R, Cruz Ferreira R. Left atrial appendage volume as a new predictor of atrial fibrillation recurrence after catheter ablation. *J. Interv. Card. Electrophysiol. Int. J. Arrhythm. Pacing* 2017;49:165–171.
101. Wen S-N, Liu N, Bai R, et al. Right atrial diameter and outcome of catheter ablation of atrial fibrillation. *J. Interv. Card. Electrophysiol. Int. J. Arrhythm. Pacing* 2017;49:157–164.
102. Akutsu Y, Kaneko K, Kodama Y, Suyama J, Li H-L, Hamazaki Y, Tanno K, Gokan T, Kobayashi Y. Association between left and right atrial remodeling with atrial fibrillation recurrence after pulmonary vein catheter ablation in patients with paroxysmal atrial fibrillation: a pilot study. *Circ. Cardiovasc. Imaging* 2011;4:524–531.
103. Carballo D, Noble S, Carballo S, Stirnemann J, Muller H, Burri H, Vuilleumier N, Talajic M, Tardif J-C, Keller P-F, Mach F, Shah D. Biomarkers and arrhythmia recurrence following radiofrequency ablation of atrial fibrillation. *J. Int. Med. Res.* 2018:300060518793807.
104. Sasaki T, Nakamura K, Naito S, Minami K, Koyama K, Yamashita E, Kumagai K, Oshima S. The Right to Left Atrial Volume Ratio Predicts Outcomes after Circumferential Pulmonary Vein Isolation of Longstanding Persistent Atrial Fibrillation. *Pacing Clin. Electrophysiol. PACE* 2016;39:1181–1190.
105. Hammerstingl C, Schwekendiek M, Momcilovic D, Schueler R, Sinning J-M, Schrickel JW, Mittmann-Braun E, Nickenig G, Lickfett L. Left atrial deformation imaging with ultrasound based two-dimensional speckle-tracking predicts the rate of recurrence of paroxysmal and persistent atrial fibrillation after successful ablation procedures. *J. Cardiovasc. Electrophysiol.* 2012;23:247–255.
106. Mochizuki A, Yuda S, Fujito T, Kawamukai M, Muranaka A, Nagahara D, Shimoshige S, Hashimoto A, Miura T. Left atrial strain assessed by three-dimensional speckle tracking echocardiography predicts atrial fibrillation recurrence after catheter ablation in patients with paroxysmal atrial fibrillation. *J. Echocardiogr.* 2017;15:79–87.
107. Motoki H, Negishi K, Kusunose K, Popović ZB, Bhargava M, Wazni OM, Saliba WI, Chung MK, Marwick TH, Klein AL. Global left atrial strain in the prediction of sinus rhythm maintenance after catheter ablation for atrial fibrillation. *J. Am. Soc. Echocardiogr. Off. Publ. Am. Soc. Echocardiogr.* 2014;27:1184–1192.
108. Ma X-X, Boldt L-H, Zhang Y-L, et al. Clinical Relevance of Left Atrial Strain to Predict Recurrence of Atrial Fibrillation after Catheter Ablation: A Meta-Analysis. *Echocardiography* 2016;33:724–733.
109. Yasuda R, Murata M, Roberts R, et al. Left atrial strain is a powerful predictor of atrial fibrillation recurrence after catheter ablation: study of a heterogeneous population with sinus rhythm or atrial fibrillation. *Eur. Heart J. Cardiovasc. Imaging* 2015;16:1008–1014.



110. Montserrat S, Gabrielli L, Bijnens B, Borràs R, Berruezo A, Poyatos S, Brugada J, Mont L, Sitges M. Left atrial deformation predicts success of first and second percutaneous atrial fibrillation ablation. *Heart Rhythm* 2015;12:11–18.
111. Hong J, Gu X, An P, Luo T, Lv Q, Kang J, He Y, Hu R, Liu X, Ma C. Left atrial functional remodeling in lone atrial fibrillation: a two-dimensional speckle tracking echocardiographic study. *Echocardiogr. Mt. Kisco N* 2013;30:1051–1060.
112. Habibi M, Lima JAC, Gucuk Ipek E, Zimmerman SL, Zipunnikov V, Spragg D, Ashikaga H, Rickard J, Marine JE, Berger RD, Calkins H, Nazarian S. The association of baseline left atrial structure and function measured with cardiac magnetic resonance and pulmonary vein isolation outcome in patients with drug-refractory atrial fibrillation. *Heart Rhythm* 2016;13:1037–1044.
113. Sardana M, Ogunsua AA, Spring M, et al. Association of Left Atrial Function Index With Late Atrial Fibrillation Recurrence after Catheter Ablation. *J. Cardiovasc. Electrophysiol.* 2016;27:1411–1419.
114. Kim M-N, Lee JJ, Kim S-A, Kim YH, Choi JI, Park S-M, Park SW, Kim Y-H, Shim W-J. The difference of predictors for recurrence after catheter ablation of non-paroxysmal atrial fibrillation according to follow-up period. *Int. Heart. J.* 2014;55:312–318.
115. Im SI, Na JO, Kim SW, Choi CU, Kim JW, Yong HS, Kim EJ, Rha S-W, Park CG, Seo HS, Oh DJ, Lim HE. Adjusted left atrial emptying fraction as a predictor of procedural outcome after catheter ablation for atrial fibrillation. *Tex. Heart Inst. J.* 2015;42:216–225.
116. Dodson JA, Neilan TG, Shah RV, Farhad H, Blankstein R, Steigner M, Michaud GF, John R, Abbasi SA, Jerosch-Herold M, Kwong RY. Left atrial passive emptying function determined by cardiac magnetic resonance predicts atrial fibrillation recurrence after pulmonary vein isolation. *Circ. Cardiovasc. Imaging* 2014;7:586–592.
117. Verma A, Marrouche NF, Yamada H, Grimm RA, Cummings J, Burkhardt JD, Kilicaslan F, Bhargava M, Karim A-A, Thomas JD, Natale A. Usefulness of intracardiac Doppler assessment of left atrial function immediately post-pulmonary vein antrum isolation to predict short-term recurrence of atrial fibrillation. *Am. J. Cardiol.* 2004;94:951–954.
118. Khurram IM, Maqbool F, Berger RD, Marine JE, Spragg DD, Ashikaga H, Zipunnikov V, Kass DA, Calkins H, Nazarian S, Zimmerman SL. Association Between Left Atrial Stiffness Index and Atrial Fibrillation Recurrence in Patients Undergoing Left Atrial Ablation. *Circ. Arrhythm. Electrophysiol.* 2016;9.
119. Sarvari SI, Haugaa KH, Stokke TM, Ansari HZ, Leren IS, Hegbom F, Smiseth OA, Edvardsen T. Strain echocardiographic assessment of left atrial function predicts recurrence of atrial fibrillation. *Eur. Heart J. Cardiovasc. Imaging* 2016;17:660–667.
120. Ciuffo L, Tao S, Gucuk Ipek E, Zghaib T, Balouch M, Lima JAC, Nazarian S, Spragg DD, Marine JE, Berger RD, Calkins H, Ashikaga H. Intra-Atrial Dyssynchrony During Sinus Rhythm Predicts Recurrence After the First Catheter Ablation for Atrial Fibrillation. *JACC Cardiovasc. Imaging* 2018.
121. Ejima K, Kato K, Arai K, et al. Impact of atrial remodeling on the outcome of radiofrequency catheter ablation of paroxysmal atrial fibrillation. *Circ. J. Off. J. Jpn. Circ. Soc.* 2014;78:872–877.

122. Fukushima K, Fukushima N, Ejima K, Kato K, Sato Y, Uematsu S, Arai K, Manaka T, Takagi A, Ashihara K, Shoda M, Hagiwara N. Left atrial appendage flow velocity and time from P-wave onset to tissue Doppler-derived A' predict atrial fibrillation recurrence after radiofrequency catheter ablation. *Echocardiogr. Mt. Kisco N* 2015;32:1101–1108.
123. den Uijl DW, Gawrysiak M, Tops LF, Trines SA, Zeppenfeld K, Schalij MJ, Bax JJ, Delgado V. Prognostic value of total atrial conduction time estimated with tissue Doppler imaging to predict the recurrence of atrial fibrillation after radiofrequency catheter ablation. *Eur. Eur. Pacing Arrhythm. Card. Electrophysiol. J. Work. Groups Card. Pacing Arrhythm. Card. Cell. Electrophysiol. Eur. Soc. Cardiol.* 2011;13:1533–1540.
124. Chao T-F, Sung S-H, Wang K-L, et al. Associations between the atrial electromechanical interval, atrial remodelling and outcome of catheter ablation in paroxysmal atrial fibrillation. *Heart Br. Card. Soc.* 2011;97:225–230.
125. Mano H, Okumura Y, Watanabe I, et al. Changes over time in echocardiographic variables and atrial electromechanical intervals after ablation for atrial fibrillation. *J. Arrhythmia* 2014;30:466–472.
126. Fiala M, Bulková V, Škňouřil L, Nevřalová R, Toman O, Januška J, Špinar J, Wichterle D. Sinus rhythm restoration and arrhythmia noninducibility are major predictors of arrhythmia-free outcome after ablation for long-standing persistent atrial fibrillation: a prospective study. *Heart Rhythm* 2015;12:687–698.
127. Ma X-X, Zhang Y-L, Hu B, Jiang W-J, Wang M, Zheng D-Y, Zhu M-R, Xue X-P. Association between left atrial appendage emptying velocity, N-terminal plasma brain natriuretic peptide levels, and recurrence of atrial fibrillation after catheter ablation. *J. Interv. Card. Electrophysiol. Int. J. Arrhythm. Pacing* 2017;48:343–350.
128. Kanda T, Masuda M, Sunaga A, Fujita M, Iida O, Okamoto S, Ishihara T, Watanabe T, Takahara M, Sakata Y, Uematsu M. Low left atrial appendage flow velocity predicts recurrence of atrial fibrillation after catheter ablation of persistent atrial fibrillation. *J. Cardiol.* 2015;66:377–381.
129. Ariyama M, Kato R, Matsumura M, Yoshimoto H, Nakajima Y, Nakano S, Kasai T, Tanno J, Senbonmatsu T, Matsumoto K, Nishimura S. Left atrial appendage wall-motion velocity associates with recurrence of nonparoxysmal atrial fibrillation after catheter ablation. *Echocardiogr. Mt. Kisco N* 2015;32:272–280.
130. Combes S, Jacob S, Combes N, Karam N, Chaumeil A, Guy-Moyat B, Treguer F, Deplagne A, Boveda S, Marijon E, Albenque J-P. Predicting favourable outcomes in the setting of radiofrequency catheter ablation of long-standing persistent atrial fibrillation: a pilot study assessing the value of left atrial appendage peak flow velocity. *Arch. Cardiovasc. Dis.* 2013;106:36–43.
131. Zhao Y, Di Biase L, Trivedi C, et al. Importance of non-pulmonary vein triggers ablation to achieve long-term freedom from paroxysmal atrial fibrillation in patients with low ejection fraction. *Heart Rhythm* 2016;13:141–149.
132. Pezawas T, Binder T, Ristl R, Schneider B, Stojkovic S, Schukro C, Schmidinger H. Selection for atrial fibrillation ablation: Importance of diastolic function grading. *J. Cardiol.* 2015;65:479–486.

133. Li C, Ding X, Zhang J, Zhou C, Chen Y, Rao L. Does the E/e' index predict the maintenance of sinus rhythm after catheter ablation of atrial fibrillation? *Echocardiogr. Mt. Kisco N* 2010;27:630–636.
134. Okamatsu H, Ohara T, Kanzaki H, Nakajima I, Miyamoto K, Okamura H, Noda T, Aiba T, Kusano K, Kamakura S, Shimizu W, Satomi K. Impact of left ventricular diastolic dysfunction on outcome of catheter ablation for atrial fibrillation in patients with hypertrophic cardiomyopathy. *Circ. J. Off. J. Jpn. Circ. Soc.* 2015;79:419–424.
135. Masuda M, Fujita M, Iida O, Okamoto S, Ishihara T, Nanto K, Kanda T, Sunaga A, Tsujimura T, Matsuda Y, Ohashi T, Uematsu M. An E/e' ratio on echocardiography predicts the existence of left atrial low-voltage areas and poor outcomes after catheter ablation for atrial fibrillation. *Eur. Eur. Pacing Arrhythm. Card. Electrophysiol. J. Work. Groups Card. Pacing Arrhythm. Card. Cell. Electrophysiol. Eur. Soc. Cardiol.* 2018;20:e60–e68.
136. Hirai T, Cotseones G, Makki N, Agrawal A, Wilber DJ, Barron JT. Usefulness of left ventricular diastolic function to predict recurrence of atrial fibrillation in patients with preserved left ventricular systolic function. *Am. J. Cardiol.* 2014;114:65–69.
137. Arques S. Clinical Relevance of the Spectral Tissue Doppler E/e' Ratio in the Management of Patients with Atrial Fibrillation: a Comprehensive Review of the Literature. *J. Atr. Fibrillation* 2018;11:2038.
138. Kosiuk J, Breithardt O-A, Bode K, Kornej J, Arya A, Piorkowski C, Gaspar T, Sommer P, Husser D, Hindricks G, Bollmann A. The predictive value of echocardiographic parameters associated with left ventricular diastolic dysfunction on short- and long-term outcomes of catheter ablation of atrial fibrillation. *Eur. Eur. Pacing Arrhythm. Card. Electrophysiol. J. Work. Groups Card. Pacing Arrhythm. Card. Cell. Electrophysiol. Eur. Soc. Cardiol.* 2014;16:1168–1174.
139. McLellan AJA, Ling L, Azzopardi S, Ellims AH, Iles LM, Sellenger MA, Morton JB, Kalman JM, Taylor AJ, Kistler PM. Diffuse ventricular fibrosis measured by T<sub>1</sub> mapping on cardiac MRI predicts success of catheter ablation for atrial fibrillation. *Circ. Arrhythm. Electrophysiol.* 2014;7:834–840.
140. Akkaya M, Higuchi K, Koopmann M, Burgon N, Erdogan E, Damal K, Kholmovski E, McGann C, Marrouche NF. Relationship between left atrial tissue structural remodelling detected using late gadolinium enhancement MRI and left ventricular hypertrophy in patients with atrial fibrillation. *Eur. Eur. Pacing Arrhythm. Card. Electrophysiol. J. Work. Groups Card. Pacing Arrhythm. Card. Cell. Electrophysiol. Eur. Soc. Cardiol.* 2013;15:1725–1732.
141. Maeda M, Oba K, Yamaguchi S, Arasaki O, Sata M, Masuzaki H, Shimabukuro M. Usefulness of Epicardial Adipose Tissue Volume to Predict Recurrent Atrial Fibrillation After Radiofrequency Catheter Ablation. *Am. J. Cardiol.* 2018;122:1694–1700.
142. Sanghai SR, Sardana M, Hansra B, Lessard DM, Dahlberg ST, Aurigemma GP, Fitzgibbons TP, McManus DD. Indexed Left Atrial Adipose Tissue Area Is Associated With Severity of Atrial Fibrillation and Atrial Fibrillation Recurrence Among Patients Undergoing Catheter Ablation. *Front. Cardiovasc. Med.* 2018;5:76.
143. Kocyigit D, Gurses KM, Yalcin MU, et al. Periatrial epicardial adipose tissue thickness is an independent predictor of atrial fibrillation recurrence after cryoballoon-based pulmonary vein isolation. *J. Cardiovasc. Comput. Tomogr.* 2015;9:295–302.

144. Kim T-H, Park J, Park J-K, Uhm J-S, Joung B, Lee M-H, Pak H-N. Pericardial fat volume is associated with clinical recurrence after catheter ablation for persistent atrial fibrillation, but not paroxysmal atrial fibrillation: an analysis of over 600-patients. *Int. J. Cardiol.* 2014;176:841–846.
145. Chao T-F, Hung C-L, Tsao H-M, et al. Epicardial adipose tissue thickness and ablation outcome of atrial fibrillation. *PloS One* 2013;8:e74926.
146. Hauser TH, Essebag V, Baldessin F, McClennen S, Yeon SB, Manning WJ, Josephson ME. Prognostic value of pulmonary vein size in prediction of atrial fibrillation recurrence after pulmonary vein isolation: a cardiovascular magnetic resonance study. *J. Cardiovasc. Magn. Reson. Off. J. Soc. Cardiovasc. Magn. Reson.* 2015;17:49.
147. Wei W, Ge J-B, Zou Y, Lin L, Cai Y, Liu X-B, Zhu W-Q. Anatomical characteristics of pulmonary veins for the prediction of postoperative recurrence after radiofrequency catheter ablation of atrial fibrillation. *PloS One* 2014;9:e93817.
148. Shimamoto K, Miura F, Shimatani Y, Nishioka K, Inoue I. Pulmonary vein volume predicts the outcome of radiofrequency catheter ablation of paroxysmal atrial fibrillation. *PloS One* 2018;13:e0201199.
149. McLellan AJA, Ling L, Ruggiero D, Wong MCG, Walters TE, Nisbet A, Shetty AK, Azzopardi S, Taylor AJ, Morton JB, Kalman JM, Kistler PM. Pulmonary vein isolation: the impact of pulmonary venous anatomy on long-term outcome of catheter ablation for paroxysmal atrial fibrillation. *Heart Rhythm* 2014;11:549–556.
150. Deng H, Shantsila A, Guo P, Zhan X, Fang X, Liao H, Liu Y, Wei W, Fu L, Wu S, Xue Y, Lip GYH. Multiple biomarkers and arrhythmia outcome following catheter ablation of atrial fibrillation: The Guangzhou Atrial Fibrillation Project. *J. Arrhythmia* 2018;34:617–625.
151. Liu J, Fang P-H, Dibs S, Hou Y, Li X-F, Zhang S. High-sensitivity C-reactive protein as a predictor of atrial fibrillation recurrence after primary circumferential pulmonary vein isolation. *Pacing Clin. Electrophysiol. PACE* 2011;34:398–406.
152. Lin Y-J, Tsao H-M, Chang S-L, et al. Prognostic implications of the high-sensitive C-reactive protein in the catheter ablation of atrial fibrillation. *Am. J. Cardiol.* 2010;105:495–501.
153. Jiang Z, Dai L, Song Z, Li H, Shu M. Association between C-reactive protein and atrial fibrillation recurrence after catheter ablation: a meta-analysis. *Clin. Cardiol.* 2013;36:548–554.
154. Jiang H, Wang W, Wang C, Xie X, Hou Y. Association of pre-ablation level of potential blood markers with atrial fibrillation recurrence after catheter ablation: a meta-analysis. *Eur. Pacing Arrhythm. Card. Electrophysiol. J. Work. Groups Card. Pacing Arrhythm. Card. Cell. Electrophysiol. Eur. Soc. Cardiol.* 2017;19:392–400.
155. Canpolat U, Oto A, Hazirolan T, Sunman H, Yorgun H, Şahiner L, Kaya EB, Aytemir K. A prospective DE-MRI study evaluating the role of TGF- $\beta$ 1 in left atrial fibrosis and implications for outcomes of cryoballoon-based catheter ablation: new insights into primary fibrotic atriacardiomyopathy. *J. Cardiovasc. Electrophysiol.* 2015;26:251–259.
156. Henningsen KMA, Nilsson B, Bruunsgaard H, Chen X, Pedersen BK, Svendsen JH. Prognostic impact of hs-CRP and IL-6 in patients undergoing radiofrequency catheter ablation for atrial fibrillation. *Scand. Cardiovasc. J. SCJ* 2009;43:285–291.

157. Wu N, Xu B, Xiang Y, Wu L, Zhang Y, Ma X, Tong S, Shu M, Song Z, Li Y, Zhong L. Association of inflammatory factors with occurrence and recurrence of atrial fibrillation: a meta-analysis. *Int. J. Cardiol.* 2013;169:62–72.
158. Li S, Yang F, Jing L, Ma J, Jia Y, Dong S, Zheng W, Zhao L. Myeloperoxidase and risk of recurrence of atrial fibrillation after catheter ablation. *J. Investig. Med. Off. Publ. Am. Fed. Clin. Res.* 2013;61:722–727.
159. Canpolat U, Aytemir K, Yorgun H, Şahiner L, Kaya EB, Kabakçı G, Tokgözoğlu L, Oto A. Role of preablation neutrophil/lymphocyte ratio on outcomes of cryoballoon-based atrial fibrillation ablation. *Am. J. Cardiol.* 2013;112:513–519.
160. Canpolat U, Aytemir K, Yorgun H, Şahiner L, Kaya EB, Çay S, Topaloğlu S, Aras D, Oto A. Usefulness of serum uric acid level to predict atrial fibrillation recurrence after cryoballoon-based catheter ablation. *Eur. Eur. Pacing Arrhythm. Card. Electrophysiol. J. Work. Groups Card. Pacing Arrhythm. Card. Cell. Electrophysiol. Eur. Soc. Cardiol.* 2014;16:1731–1737.
161. He X, Li S, Zhan J, Xie S, Zhang Z, Dong J, Yu R, Long D, Tang R, Ma C. Serum uric acid levels correlate with recurrence of paroxysmal atrial fibrillation after catheter ablation. *Chin. Med. J. (Engl.)* 2013;126:860–864.
162. Uçar FM, Gucuk İpek E, Acar B, Gul M, Tunçez A, Özeke Ö, Geyik B, Topaloglu S, Aras D. Gamma-glutamyl transferase predicts recurrences of atrial fibrillation after catheter ablation. *Acta Cardiol.* 2016;71:205–210.
163. Böhm A, Tothova L, Urban L, Slezak P, Bacharova L, Musil P, Hatala R. The relation between oxidative stress biomarkers and atrial fibrillation after pulmonary veins isolation. *J. Electrocardiol.* 2016;49:423–428.
164. den Uijl DW, Delgado V, Tops LF, Ng ACT, Boersma E, Trines SA, Zeppenfeld K, Schalij MJ, van der Laarse A, Bax JJ. Natriuretic peptide levels predict recurrence of atrial fibrillation after radiofrequency catheter ablation. *Am. Heart J.* 2011;161:197–203.
165. Shaikh AY, Esa N, Martin-Doyle W, Kinno M, Nieto I, Floyd KC, Browning C, Ennis C, Donahue JK, Rosenthal LS, McManus DD. Addition of B-Type Natriuretic Peptide to Existing Clinical Risk Scores Enhances Identification of Patients at Risk for Atrial Fibrillation Recurrence After Pulmonary Vein Isolation. *Crit. Pathw. Cardiol.* 2015;14:157–165.
166. Degener S, Pattberg SV, Feuersenger H, Bansmann PM, Shin D-I, Krummenauer F, Horlitz M. Predictive value of B-type natriuretic peptide levels in patients with paroxysmal and persistent atrial fibrillation undergoing pulmonary vein isolation. *J. Interv. Card. Electrophysiol. Int. J. Arrhythm. Pacing* 2011;30:217–225.
167. Xing SY, Wang HL, Dong PS, Lai LH, Zhu JH, Zhao JF, Shang XY. Clinical significance and levels of blood brain natriuretic peptides in patients with persistent atrial fibrillation before and after catheter ablation. *Genet. Mol. Res. GMR* 2015;14:6953–6959.
168. Pillarisetti J, Reddy N, Biriya M, et al. Elevated brain natriuretic peptide level in patients undergoing atrial fibrillation ablation: is it a predictor of failed ablation or a mere function of atrial rhythm and rate at a point in time? *J. Interv. Card. Electrophysiol. Int. J. Arrhythm. Pacing* 2014;40:161–168.
169. Wu X-Y, Li S-N, Wen S-N, Nie J-G, Deng W-N, Bai R, Liu N, Tang R-B, Zhang T, Du X, Dong J-Z, Ma C-S. Plasma galectin-3 predicts clinical outcomes after catheter ablation in persistent atrial fibrillation patients without structural heart disease. *Eur. Eur. Pacing*

Arrhythm. Card. Electrophysiol. J. Work. Groups Card. Pacing Arrhythm. Card. Cell. Electrophysiol. Eur. Soc. Cardiol. 2015;17:1541–1547.

170. Okar S, Kaypakli O, Şahin DY, Koç M. Fibrosis Marker Soluble ST2 Predicts Atrial Fibrillation Recurrence after Cryoballoon Catheter Ablation of Nonvalvular Paroxysmal Atrial Fibrillation. *Korean Circ. J.* 2018;48:920–929.

171. Kornej J, Ueberham L, Schmidl J, Husser D, Adams V, Hindricks G, Bollmann A. Addition of TGF- $\beta$ 1 to existing clinical risk scores does not improve prediction for arrhythmia recurrences after catheter ablation of atrial fibrillation. *Int. J. Cardiol.* 2016;221:52–54.

172. Tian Y, Wang Y, Chen W, Yin Y, Qin M. Role of serum TGF- $\beta$ 1 level in atrial fibrosis and outcome after catheter ablation for paroxysmal atrial fibrillation. *Medicine (Baltimore)* 2017;96:e9210.

173. Wu C-H, Hu Y-F, Chou C-Y, Lin Y-J, Chang S-L, Lo L-W, Tuan T-C, Li C-H, Chao T-F, Chung F-P, Liao J-N, Chen S-A. Transforming growth factor- $\beta$ 1 level and outcome after catheter ablation for nonparoxysmal atrial fibrillation. *Heart Rhythm* 2013;10:10–15.

174. Song Z-P, Liu X, Zhang D-D. Connective tissue growth factor: a predictor of recurrence after catheter ablation in patients with nonparoxysmal atrial fibrillation. *Pacing Clin. Electrophysiol. PACE* 2014;37:630–637.

175. Zhou Q, Maleck C, von Ungern-Sternberg SNI, et al. Circulating MicroRNA-21 Correlates With Left Atrial Low-Voltage Areas and Is Associated With Procedure Outcome in Patients Undergoing Atrial Fibrillation Ablation. *Circ. Arrhythm. Electrophysiol.* 2018;11:e006242.

176. Cao H, Wu Y, Li Q, Wu Y, Zhou Q, Røe OD, Chen Y, Wang R, Wang D. Serum sRANKL/OPG predict recurrence after radiofrequency catheter ablation of lone atrial fibrillation. *Int. J. Cardiol.* 2014;170:298–302.

177. Yao Y, Yao W, Bai R, et al. Plasma homocysteine levels predict early recurrence after catheter ablation of persistent atrial fibrillation. *Eur. Eur. Pacing Arrhythm. Card. Electrophysiol. J. Work. Groups Card. Pacing Arrhythm. Card. Cell. Electrophysiol. Eur. Soc. Cardiol.* 2017;19:66–71.

178. Wei S-B, Wang W, Liu N, et al. U-shaped association between serum free triiodothyronine and recurrence of atrial fibrillation after catheter ablation. *J. Interv. Card. Electrophysiol. Int. J. Arrhythm. Pacing* 2018;51:263–270.

179. Lu Z-H, Liu N, Bai R, Yao Y, Li S-N, Yu R-H, Sang C-H, Tang R-B, Long D-Y, Du X, Dong J-Z, Ma C-S. HbA1c levels as predictors of ablation outcome in type 2 diabetes mellitus and paroxysmal atrial fibrillation. *Herz* 2015;40 Suppl 2:130–136.

180. Zou C, Zhang Z, Zhao W, Li G, Ma G, Yang X, Zhang J, Zhang L. Predictive value of pre-procedural autoantibodies against M2-muscarinic acetylcholine receptor for recurrence of atrial fibrillation one year after radiofrequency catheter ablation. *J. Transl. Med.* 2013;11:7.

181. Nakazawa Y, Ashihara T, Tsutamoto T, Ito M, Horie M. Endothelin-1 as a predictor of atrial fibrillation recurrence after pulmonary vein isolation. *Heart Rhythm* 2009;6:725–730.

182. Johner N, Namdar M, Shah DC. Intra- and interatrial conduction abnormalities: hemodynamic and arrhythmic significance. *J. Interv. Card. Electrophysiol. Int. J. Arrhythm. Pacing* 2018;52:293–302.

183. Wang Y-S, Chen G-Y, Li X-H, Zhou X, Li Y-G. Prolonged P-wave duration is associated with atrial fibrillation recurrence after radiofrequency catheter ablation: A systematic review and meta-analysis. *Int. J. Cardiol.* 2017;227:355–359.
184. Caldwell J, Koppikar S, Barake W, Redfearn D, Michael K, Simpson C, Hopman W, Baranchuk A. Prolonged P-wave duration is associated with atrial fibrillation recurrence after successful pulmonary vein isolation for paroxysmal atrial fibrillation. *J. Interv. Card. Electrophysiol. Int. J. Arrhythm. Pacing* 2014;39:131–138.
185. Kaypakli O, Koca H, Şahin DY, Okar S, Karataş F, Koç M. Association of P wave duration index with atrial fibrillation recurrence after cryoballoon catheter ablation. *J. Electrocardiol.* 2018;51:182–187.
186. Huo Y, Holmqvist F, Carlson J, Gaspar T, Hindricks G, Piorkowski C, Bollmann A, Platonov PG. Variability of P-wave morphology predicts the outcome of circumferential pulmonary vein isolation in patients with recurrent atrial fibrillation. *J. Electrocardiol.* 2015;48:218–225.
187. Park J, Kim T-H, Lee JS, Park JK, Uhm JS, Joung B, Lee MH, Pak H-N. Prolonged PR interval predicts clinical recurrence of atrial fibrillation after catheter ablation. *J. Am. Heart Assoc.* 2014;3:e001277.
188. Li S-N, Wang L, Dong J-Z, Yu R-H, Long D-Y, Tang R-B, Sang C-H, Jiang C-X, Liu N, Bai R, Du X, Ma C-S. Electrocardiographic left ventricular hypertrophy predicts recurrence of atrial arrhythmias after catheter ablation of paroxysmal atrial fibrillation. *Clin. Cardiol.* 2018;41:797–802.
189. Ma N, Wu X-Y, Ma C-S, Liu N, Bai R, Du X, Ruan Y-F, Dong J-Z. QTc interval predicts outcome of catheter ablation in paroxysmal atrial fibrillation patients with type 2 diabetes mellitus. *J. Huazhong Univ. Sci. Technol. Med. Sci. Hua Zhong Ke Ji Xue Xue Bao Yi Xue Ying Wen Ban Huazhong Keji Daxue Xuebao Yixue Yingdewen Ban* 2016;36:646–652.
190. Wen S-N, Liu N, Li S-N, et al. QTc Interval Prolongation Predicts Arrhythmia Recurrence After Catheter Ablation of Atrial Fibrillation in Patients With Hypertrophic Cardiomyopathy. *Circ. J. Off. J. Jpn. Circ. Soc.* 2015;79:1024–1030.
191. Masuda M, Fujita M, Iida O, et al. Left atrial low-voltage areas predict atrial fibrillation recurrence after catheter ablation in patients with paroxysmal atrial fibrillation. *Int. J. Cardiol.* 2018;257:97–101.
192. Yamaguchi T, Tsuchiya T, Nagamoto Y, Miyamoto K, Murotani K, Okishige K, Takahashi N. Long-term results of pulmonary vein antrum isolation in patients with atrial fibrillation: an analysis in regards to substrates and pulmonary vein reconnections. *Eur. Pacing Arrhythm. Card. Electrophysiol. J. Work. Groups Card. Pacing Arrhythm. Card. Cell. Electrophysiol. Eur. Soc. Cardiol.* 2014;16:511–520.
193. Verma A, Wazni OM, Marrouche NF, et al. Pre-existent left atrial scarring in patients undergoing pulmonary vein antrum isolation: an independent predictor of procedural failure. *J. Am. Coll. Cardiol.* 2005;45:285–292.
194. Yamaguchi N, Okumura Y, Watanabe I, et al. Impact of Sinus Node Recovery Time after Long-Standing Atrial Fibrillation Termination on the Long-Term Outcome of Catheter Ablation. *Int. Heart. J.* 2018;59:497–502.

195. Park J, Shim J, Uhm J-S, Joung B, Lee M-H, Pak H-N. Post-shock sinus node recovery time is an independent predictor of recurrence after catheter ablation of longstanding persistent atrial fibrillation. *Int. J. Cardiol.* 2013;168:1937–1942.
196. Hidalgo-Munoz AR, Tome AM, Latcu DG, Zarzoso V. Empirical mode decomposition of multiple ECG leads for catheter ablation long-term outcome prediction in persistent atrial fibrillation. *Conf. Proc. Annu. Int. Conf. IEEE Eng. Med. Biol. Soc. IEEE Eng. Med. Biol. Soc. Annu. Conf.* 2015;2015:105–108.
197. Zarzoso V, Latcu DG, Hidalgo-Muñoz AR, Meo M, Meste O, Popescu I, Saoudi N. Non-invasive prediction of catheter ablation outcome in persistent atrial fibrillation by fibrillatory wave amplitude computation in multiple electrocardiogram leads. *Arch. Cardiovasc. Dis.* 2016;109:679–688.
198. Cheng Z, Deng H, Cheng K, Chen T, Gao P, Yu M, Fang Q. The amplitude of fibrillatory waves on leads aVF and V1 predicting the recurrence of persistent atrial fibrillation patients who underwent catheter ablation. *Ann. Noninvasive Electrocardiol. Off. J. Int. Soc. Holter Noninvasive Electrocardiol. Inc* 2013;18:352–358.
199. Alcaraz R, Hornero F, Rieta JJ. Electrocardiographic Spectral Features for Long-Term Outcome Prognosis of Atrial Fibrillation Catheter Ablation. *Ann. Biomed. Eng.* 2016;44:3307–3318.
200. Di Marco LY, Raine D, Bourke JP, Langley P. Recurring patterns of atrial fibrillation in surface ECG predict restoration of sinus rhythm by catheter ablation. *Comput. Biol. Med.* 2014;54:172–179.
201. Yin X, Zhao Z, Gao L, Chang D, Xiao X, Zhang R, Chen Q, Cheng J, Yang Y, Xi Y, Xia Y. Frequency Gradient Within Coronary Sinus Predicts the Long-Term Outcome of Persistent Atrial Fibrillation Catheter Ablation. *J. Am. Heart Assoc.* 2017;6.
202. Szilágyi J, Walters TE, Marcus GM, Vedantham V, Moss JD, Badhwar N, Lee B, Lee R, Tseng ZH, Gerstenfeld EP. Surface ECG and intracardiac spectral measures predict atrial fibrillation recurrence after catheter ablation. *J. Cardiovasc. Electrophysiol.* 2018;29:1371–1378.
203. Shah D, Haissaguerre M, Jais P, Hocini M. Nonpulmonary Vein Foci: Pacing Clin. *Electrophysiol.* 2003;26:1631–1635.
204. Lo L-W, Lin Y-J, Chang S-L, Hu Y-F, Chao T-F, Chung F-P, Liao J-N, Chiou C-W, Tsao H-M, Chen S-A. Predictors and Characteristics of Multiple (More Than 2) Catheter Ablation Procedures for Atrial Fibrillation. *J. Cardiovasc. Electrophysiol.* 2015;26:1048–1056.
205. Takigawa M, Takahashi A, Kuwahara T, et al. Long-term outcome after catheter ablation of paroxysmal atrial fibrillation: Impact of different atrial fibrillation foci. *Int. J. Cardiol.* 2017;227:407–412.
206. Kuroi A, Miyazaki S, Usui E, Ichihara N, Kanaji Y, Takagi T, Iwasawa J, Nakamura H, Taniguchi H, Hachiya H, Iesaka Y. Adenosine-Provoked Atrial Fibrillation Originating From Non-Pulmonary Vein Foci: The Clinical Significance and Outcome After Catheter Ablation. *JACC Clin. Electrophysiol.* 2015;1:127–135.
207. Anter E, Contreras-Valdes FM, Shvilkin A, Tschabrunn CM, Josephson ME. Acute pulmonary vein reconnection is a predictor of atrial fibrillation recurrence following pulmonary vein isolation. *J. Interv. Card. Electrophysiol. Int. J. Arrhythm. Pacing* 2014;39:225–232.



208. Kang JH, Lee DI, Kim S, Kim MN, Park YM, Ban JE, Choi JI, Lim HE, Park SW, Kim Y-H. Prediction of long-term outcomes of catheter ablation of persistent atrial fibrillation by parameters of preablation DC cardioversion. *J. Cardiovasc. Electrophysiol.* 2012;23:1165–1170.
